# Supplementary material
Source: PubMed Central journal article supplement (PMC3109104)
Supplement: NIHMS276919-supplement-Table.pdf [file NIHMS276919-supplement-Table.pdf]

Supplementary Table 1. P-values contrasting host mortality after infection with various isolates of *P. sneebia* and *P. burhodogranariea* strain B. P-value cut off was corrected for multiple testing using a Bonferroni correction, resulting in a cut off value of  $p=0.00625$  for *P. sneebia* isolates and  $p=0.025$  for *P. burhodogranariea* isolates. Values in bold are those that are significantly different than mortality caused by the Type strain of the respective species.

|                                          | <i>P. sneebia</i> strain Type          |
|------------------------------------------|----------------------------------------|
| <i>P. sneebia</i> strain A101            | 0.099                                  |
| <i>P. sneebia</i> strain A102            | <b>0.0003</b>                          |
| <i>P. sneebia</i> strain A104            | <b>0.0002</b>                          |
| <i>P. sneebia</i> strain A16             | <b>&lt;0.0001</b>                      |
| <i>P. sneebia</i> strain A36             | <b>0.0019</b>                          |
| <i>P. sneebia</i> strain A75             | 0.8125                                 |
| <i>P. sneebia</i> strain A83             | 0.6826                                 |
| <i>P. sneebia</i> strain A91             | 0.2144                                 |
|                                          | <i>P. burhodogranariea</i><br>strain B |
| <i>P. burhodogranariea</i><br>strain B18 | 0.0326                                 |
| <i>P. burhodogranariea</i><br>strain B97 | <b>0.0003</b>                          |
